# Supplementary material
Source: publisher site journal article supplement (https://www.dovepress.com/article/supplementary_file/576917/576917_Supplementary%20Materials_1.docx)
Supplement: Supplementary file 1 [file 576917_Supplementary%20Materials_1.docx]

**Supplementary Materials**

**Table S1** Mixed Aspergillosis and Mucormycosis from January 2015 to January 2025

| Study | Gender | age | underlying conditions/risk factors | Infection Site | Detection Methods for Mucor | Treatment | Outcome |
| --- | --- | --- | --- | --- | --- | --- | --- |
| Sakalihasan S, et al,2025 6 | male | 54y | Diffuse Large B-cell Lymphoma Use of corticosteroids | lung、sinuses | PCR | L-AmB、 ICZ、VCZ、Surgery | survival |
| Wang S, et al,20247 | female | 11y | Diabetes | lung | NGS、pathology、culture | VCZ、ICZ、L-AmB、Surgery | survival |
| Wang Q, et al,20248 | male | 32y | SLE Use of corticosteroids Use of immunosuppressants | brain、nose、lung | NGS | VCZ、Surgery、AmB、PCZ | death |
| Bredehoeft C T, et al,20249 | male | 40y | Liver transplantation Use of corticosteroids Use of immunosuppressants | Right mandibular mucosa and gingiva | culture | PCZ、L-AmB、Surgery | survival |
| Ling F X, et al,202410 | male | 60y | Diabetes | lung | NGS、pathology | ITC、L-AmB、Surgery、VCZ、AmB | survival |
| Gotecha S, et al,202411 | female | 32y | None | brain | pathology | Surgery、L-AmB、PCZ | survival |
| Sasani E, et al,202412 | female | 49y | Diabetes COVID-19 Use of corticosteroids | nose、Orbital、brain | Direct microscopic examination、culture、pathology | L-AmB、Surgery | death |
| male | 73y | Diabetes COVID-19 Use of corticosteroids | nose、Orbital、brain | Direct microscopic examination、culture、pathology | L-AmB、Surgery | death |
| male | 46y | Hypothyroidism COVID-19 Use of corticosteroids | nose、Orbital、brain | Direct microscopic examination、culture、pathology | L-AmB、Surgery、PCZ | survival |
| male | 62y | Diabetes Kidney Transplant COVID-19 Use of corticosteroids Use of immunosuppressants | nose、Orbital、brain | Direct microscopic examination、culture、pathology | L-AmB、Surgery、PCZ | survival |
| Menia R, et al,202313 | male | 48y | COVID-19 Use of corticosteroids | maxilla | pathology | Surgery | - |
| male | 42y | Diabetes COVID-19 Use of corticosteroids | nose、Orbital、brain | Direct microscopic examination、culture、pathology | Surgery、AmB | death |
| female | 56y | Diabetes COVID-19 Use of corticosteroids | nose、Orbital | culture、pathology | Surgery | survival |
| male | 64y | Diabetes COVID-19 Use of corticosteroids | nose、Orbital、palate | culture、pathology | - | death |
| Zhang Y, et al,202314 | male | 12y | AML Chemotherapy | lung、brain、Skin and mucous membranes | NGS | ABCD、PCZ、AmB-d、VCZ、Surgery | survival |
| Sun G, et al,202315 | male | 20+y | AIDS | brain | pathology、PCR | L-AmB、ICZ | survival |
| Nair A, et al,202316 | female | 3y | None | brain、lung | autopsy | - | death |
| Pérez M A, et al,202317 | female | 48y | Diabetes | nose、Orbital、brain、stomach | culture、pathology | L-AmB、Surgery、PCZ | survival |
| Murray J, et al,202318 | female | 40y | ALL Peripheral Blood Stem Cell Transplantation  Chemotherapy Radiation therapy | lung、brain、intestine、pancreas、stomach | autopsy | - | death |
| female | 62y | AML Chemotherapy | lung、intestine | autopsy | - | death |
| Sardeshmukh A A, et al,202319 | - | 75y | Maxillofacial Trauma | nose、maxilla | Direct microscopic examination、pathology | AmB、Surgery | survival |
| Mohanty B, et al,202220 | female | 67y | Diabetes COVID-19 | sinuses | Direct microscopic examination、pathology | Surgery、VCZ、L-AmB、PCZ | survival |
| Guo L, et al,202221 | male | 40y | Hemorrhagic Fever with Renal Syndrome | nose、lung | culture | CPF、VCZ、AmB | survival |
| Loubet D, et al,202322 | male | 68y | Use of corticosteroids Hemophagocytic Lymphohistiocytosis | nose、Orbital、brain、lung | Direct microscopic examination、PCR | VCZ、L-AmB、ICZ、PCZ | death |
| Ramani P, et al,202223 | male | 41y | Diabetes COVID-19 Use of corticosteroids | nose、maxilla | pathology | - | - |
| Kumar M, et al,202224 | male | 55y | Diabetes | bladder | pathology | Remove necrotic tissue、PCZ | - |
| Paul M, et al,202225 | female | 32y | Diabetes COVID-19 Use of corticosteroids | nose、Orbital、brain | Direct microscopic examination、pathology | Surgery、AmB | death |
| female | 53y | Diabetes COVID-19 Use of corticosteroids | nose、brain | Direct microscopic examination、culture、pathology | Surgery、AmB | death |
| male | 38y | Diabetes COVID-19 | nose | Direct microscopic examination、culture | Surgery、AmB | survival |
| male | 47y | Diabetes COVID-19 Use of corticosteroids | nose、maxilla | Direct microscopic examination、culture、pathology | Surgery、AmB | survival |
| male | 45y | Diabetes COVID-19 Use of corticosteroids | nose、Orbital、brain | Direct microscopic examination、culture、pathology | Surgery、AmB | survival |
| female | 30y | Diabetes COVID-19 Use of corticosteroids | nose、Orbital、brain | Direct microscopic examination、pathology | Surgery、AmB | survival |
| male | 42y | Diabetes COVID-19 Use of corticosteroids | nose | Direct microscopic examination、pathology | Surgery、AmB | survival |
| male | 55y | Diabetes COVID-19 Use of corticosteroids | nose、Orbital、brain | Direct microscopic examination、culture、pathology | Surgery、AmB | survival |
| female | 60y | Diabetes Tuberculosis COVID-19 Use of corticosteroids | nose、Orbital、brain | Direct microscopic examination、pathology | Surgery、AmB | survival |
| male | 45y | Diabetes COVID-19 Use of corticosteroids | nose、Orbital | Direct microscopic examination、culture、pathology | Surgery、AmB | survival |
| Kim J H, et al,202326 | male | 69y | COVID-19 Use of corticosteroids | lung | pathology | VCZ、L-AmB | death |
| Serris A, et al,202227 | - | 56y | Diabetes COVID-19 Use of corticosteroids use of immunosuppressants | brain、nose、lung | PCR、pathology | VCZ、Surgery、L-AmB、ICZ | death |
| Rathna R, et al,202228 | male | 48y | Diabetes COVID-19 Use of corticosteroids | lung | culture、pathology | L-AmB、Surgery | - |
| Melchers M, et al,202229 | male | 67y | Diabetes CLL COVID-19 Use of corticosteroids use of immunosuppressants | Lung、Kidney、Bladder | culture、Direct microscopic examination、autopsy | VCZ、ICZ、AmB、L-AmB | death |
| Olivo Freites C, et al,202230 | female | 60y | COPD use of immunosuppressants | lung | culture | L-AmB | survival |
| Ramírez-Hinojosa J P, et al,202131 | male | 52y | Diabetes | palate、maxillary sinus | pathology | AmB-d、Surgery、AmB、CPF | death |
| Benhadid-Brahmi Y, et al,202232 | male | 74y | COVID-19 Use of corticosteroids | lung | Direct microscopic examination、culture、PCR | VCZ、L-AmB | death |
| Teng P, et al,202233 | female | 54y | Diabetes | lung | pathology | VCZ、AmB、L-AmB、Surgery、PCZ | survival |
| Lai C C, et al,202234 | male | 70y | COVID-19 Use of corticosteroids use of immunosuppressants | lung | culture | VCZ、L-AmB、ICZ | death |
| Ravindra C M, et al,202135 | male | 70y | None | lung | pathology | Surgery、L-AmB | survival |
| male | 65y | None | lung | pathology | L-AmB | survival |
| Sahu E S, et al,202136 | male | 36y | COVID-19 Use of corticosteroids | nose、Orbital、brain | culture | Surgery、L-AmB、PCZ | survival |
| Hu Z min, et al,202137 | female | 51y | Diabetes ALL Chemotherapy | Lung、jejunum | Direct microscopic examination、culture、pathology | VCZ、d-AmB、L-AmB、PCZ、Surgery | death |
| Johnson A K, et al,202138 | male | 79y | Diabetes COVID-19 Use of corticosteroids | lung | culture | VCZ、L-AmB | - |
| Bellanger A P, et al,202139 | male | 55y | Follicular Lymphoma Autologous hematopoietic stem cell transplantation COVID-19 | lung | culture | L-AmB | death |
| Jawanda M K, et al,202140 | male | 50y | Diabetes COVID-19 Use of corticosteroids use of immunosuppressants | sinuses | pathology | Surgery、VCZ、PCZ | survival |
| Zayet S, et al,202041 | female | 69y | Diabetes | nose、Orbital、brain | pathology | d-AmB、Surgery、VCZ | survival |
| Malhothra S, et al,202042 | female | 60y | Diabetes | nose、eye | Direct microscopic examination、culture、pathology | AmB、Surgery、VCZ | survival |
| Tsikala-Vafea M, et al,202043 | male | 79y | CML Chemotherapy | lung、heart、brain、kidney | autopsy | - | death |
| Aqsa A, et al,202044 | female | 77y | Diabetes MM Chemotherapy | lung、sinuses | culture、pathology | L-AmB、Surgery | death |
| Mantero V, et al,202045 | female | 55y | Dermatomyositis Use of corticosteroids | brain | autopsy | VCZ、L-AmB | death |
| Lin L, et al,201946 | male | 52y | Diabetes | lung | pathology | VCZ、PCZ、Surgery | survival |
| Urs A B, et al,201947 | female | 76y | Diabetes | Upper left posterior tooth area | pathology | - | - |
| Zhang Q, et al,201948 | male | 44y | Kidney Transplant Use of corticosteroids Use of immunosuppressants | lung | culture | VCZ、L-AmB、PCZ、AmB | survival |
| Pouvaret A, et al,201949 | female | 52y | CLL Chemotherapy | brain、kidney | pathology、PCR | VCZ、ICZ、L-AmB | survival |
| Trachuk P, et al,201850 | male | 41y | Mediastinal Germ Cell Tumor Chemotherapy | lung、stomach | pathology | Surgery、L-AmB、VCZ、ICZ、PCZ、MCFG | survival |
| Persichino J G, et al,201851 | male | 58y | Decompensated cirrhosis | lung | Direct microscopic examination、culture | MCFG、VCZ、L-AmB | death |
| Kaneko Y, et al,201852 | female | 53y | After esophageal cancer surgery Use of corticosteroids | intestine | pathology、culture、Gene sequencing | Surgery、CPF、L-AmB | survival |
| Point S, et al,201753 | male | 61y | Diabetic ketoacidosis | lung、sinuses | pathology、PCR | VCZ、L-AmB、CPF、PCZ | survival |
| Habroosh F A, et al,201754 | male | 17m | None | Orbital | pathology | VCZ、L-AmB、Surgery | survival |
| Bhagat M, et al,201655 | female | 61y | COPD Use of corticosteroids | lung、brain | pathology、culture | VCZ、MCFG、Surgery、AmB | death |
| Chermetz M, et al,201656 | female | 17y | Brainstem glioma  Chemotherapy  Use of corticosteroids | nose、right mandible | pathology | Fluconazole、L-AmB、MCFG | death |
| Mahomed S, et al,201557 | female | 54y | Diabetic Ketoacidosis | nose、Orbital、brain | pathology、culture | Surgery、AmB、PCZ | survival |
| Torres-Damas W, et al,201558 | male | 78y | Diabetic Ketoacidosis | nose、Orbital、brain | pathology | Surgery、VCZ、d-AmB | death |
| Jc P L, et al,201559 | male | 17y | Traffic accident injury Use of corticosteroids | nose、lung、stomach、intestine | pathology | Surgery、VCZ、L-AmB | survival |
| this case | male | 61y | COPD RA Use of corticosteroids | nose、lung | Direct microscopic examination | VCZ、CPF、PCZ、AmB | death |

SLE: Systemic Lupus Erythematosus;COVID-19: Novel Coronavirus Infection; AML: Acute Myeloid Leukemia;ALL: Acute Lymphoblastic Leukemia;CLL: Chronic Lymphocytic Leukemia;MM: Multiple Myeloma;COPD: Chronic Obstructive Pulmonary Disease;RA: Rheumatoid Arthritis;L-AmB: Liposomal Amphotericin B; ICZ: Isavuconazole; VCZ: Voriconazole; AmB: Amphotericin B; PCZ: Posaconazole; ABCD: AmphotericinBcolloidal dispersion; AmB-d: Amphotericin B deoxycholate; ITC: Itraconazole ;CPF: Caspofungin; MCFG: Micafungin.
